# Supplementary material for: Mapping the diversity of land uses following deforestation across Africa
Source: PubMed Central journal article supplement (PMC10798993; doi:10.1038/s41598-024-52138-9), 2024-01-19
Supplement: 41598_2024_52138_MOESM1_ESM.pdf [file 41598_2024_52138_MOESM1_ESM.pdf]

## **Appendix A Area of land-use following deforestation by country**

Here we present a table that shows the area of land use following deforestation in Mega hectare (Mha) including the total area per country in the last column. Presenting the area in Mha is useful for the reader to compare with in-situ statistics and turns the shares into absolute figures. However, we want to highlight that, this data was derived based on the global Hansen deforestation layer as a proxy for deforestation thus it does have errors (underestimation and overestimation of forest loss) [2, 90, 91], especially when computing absolute values [82, 84, 85]. Thus the absolute total area determined from this data will have bias, thus should be used/interpreted with caution. That's why to minimize these bias we chose to present the amount of land use following deforestation in proportion (%) (Figure 4), instead of absolute values.

|                          | Small scale cropland | Other-land with tree cover | Large scale cropland | Cacao     | Pasture   | Cashew    | Settlement | Plantation forest | Roads    | Mining   | Rubber   | OilPalm  | Water    | Tea plantation | Coffee   | Total (Mha)       |
|--------------------------|----------------------|----------------------------|----------------------|-----------|-----------|-----------|------------|-------------------|----------|----------|----------|----------|----------|----------------|----------|-------------------|
| <b>Africa</b>            | <b>404549.170</b>    | 67246.322                  | 55595.827            | 22488.028 | 17125.437 | 13433.335 | 10553.928  | 8080.659          | 7358.839 | 7159.060 | 4186.242 | 3555.611 | 2484.728 | 1235.054       | 1318.852 | <b>626371.092</b> |
| Angola                   | 34598.121            | 3649.914                   | 4036.557             | 211.961   | 1171.274  | 198.291   | 708.801    | 72.831            | 581.682  | 703.257  | 47.304   | 17.905   | 85.660   | 15.792         | 47.839   | 46147.188         |
| Benin                    | 3431.569             | 287.637                    | 1758.046             | 7.236     | 363.076   | 72.532    | 167.204    | 7.087             | 31.709   | 72.386   | 23.338   | 6.804    | 6.707    | 3.269          | 7.510    | 6246.109          |
| Botswana                 | 34.207               | 5.786                      | 29.870               | 0.000     | 14.419    | 0.034     | 2.406      | 0.133             | 1.779    | 7.017    | 0.001    | 0.000    | 2.184    | 0.052          | 0.144    | 98.032            |
| Burundi                  | 433.511              | 8.300                      | 29.420               | 0.690     | 3.519     | 0.833     | 24.010     | 8.251             | 4.373    | 7.200    | 1.289    | 3.647    | 1.308    | 8.398          | 1.642    | 536.390           |
| Cameroon                 | 7149.104             | 3990.821                   | 1567.328             | 1419.949  | 54.369    | 140.228   | 619.051    | 69.652            | 524.237  | 155.639  | 435.069  | 302.606  | 142.711  | 46.149         | 64.305   | 16681.217         |
| Cape Verde               | 0.788                | 0.012                      | 5.758                | 0.000     | 0.285     | 0.000     | 0.283      | 0.012             | 0.012    | 1.068    | 0.000    | 0.000    | 0.161    | 0.002          | 0.017    | 8.397             |
| Central African Republic | 5865.062             | 2286.549                   | 191.033              | 282.476   | 548.779   | 79.039    | 86.985     | 17.445            | 149.633  | 69.077   | 17.084   | 21.611   | 17.043   | 12.750         | 16.551   | 9661.116          |
| Chad                     | 5887.584             | 1022.214                   | 1269.662             | 0.254     | 231.259   | 10.224    | 19.420     | 2.451             | 60.475   | 68.822   | 0.467    | 0.571    | 11.280   | 0.920          | 2.086    | 8587.689          |
| Comoros                  | 47.873               | 2.701                      | 1.611                | 0.171     | 0.308     | 0.351     | 1.919      | 0.174             | 0.457    | 3.265    | 0.031    | 0.028    | 1.486    | 0.088          | 0.187    | 60.647            |
| Congo                    | 4363.313             | 2556.515                   | 539.769              | 397.474   | 22.912    | 69.151    | 112.419    | 20.091            | 458.517  | 71.156   | 151.582  | 49.193   | 68.934   | 14.226         | 17.089   | 8912.340          |
| DRC                      | 13877.732            | 12761.981                  | 4078.973             | 971.022   | 611.762   | 347.079   | 1720.773   | 176.537           | 1436.400 | 818.413  | 139.631  | 435.831  | 427.056  | 64.736         | 160.029  | 162927.955        |
| Equatorial Guinea        | 424.643              | 421.298                    | 20.014               | 27.876    | 1.113     | 8.006     | 75.102     | 5.979             | 165.731  | 61.529   | 5.403    | 2.560    | 3.558    | 1.567          | 4.789    | 1229.169          |
| Eswatini                 | 262.556              | 29.818                     | 257.782              | 0.245     | 12.521    | 3.590     | 40.189     | 611.562           | 25.802   | 43.343   | 1.840    | 0.956    | 4.777    | 15.692         | 6.190    | 1316.860          |
| Ethiopia                 | 4134.494             | 531.390                    | 840.031              | 63.480    | 260.637   | 25.070    | 158.869    | 30.966            | 60.587   | 78.506   | 5.832    | 7.452    | 37.041   | 9.659          | 10.406   | 6254.418          |
| Gabon                    | 1179.257             | 1600.912                   | 232.881              | 463.104   | 8.249     | 57.795    | 109.088    | 21.567            | 259.046  | 47.765   | 326.196  | 255.142  | 36.969   | 14.089         | 17.352   | 4629.411          |
| Gambia                   | 41.568               | 8.525                      | 94.782               | 0.000     | 8.982     | 0.124     | 17.009     | 0.292             | 0.892    | 4.545    | 0.018    | 0.013    | 1.073    | 0.041          | 0.303    | 178.167           |
| Ghana                    | 4550.910             | 2876.247                   | 1694.818             | 4452.568  | 106.372   | 1085.671  | 985.070    | 102.479           | 315.781  | 468.848  | 263.483  | 332.644  | 129.659  | 82.066         | 95.267   | 17541.882         |
| Guinea                   | 13769.491            | 4533.825                   | 3729.352             | 694.405   | 233.393   | 1569.137  | 387.067    | 79.242            | 330.943  | 250.201  | 73.171   | 71.159   | 116.723  | 53.483         | 70.264   | 25961.856         |
| Ivory Coast              | 15573.849            | 7608.919                   | 3272.554             | 9570.307  | 239.535   | 3289.406  | 1188.290   | 250.543           | 588.896  | 333.494  | 1537.429 | 814.459  | 266.200  | 208.552        | 215.860  | 44958.292         |
| Kenya                    | 2801.912             | 193.121                    | 447.163              | 7.928     | 986.371   | 104.374   | 108.453    | 275.193           | 43.959   | 102.560  | 11.304   | 22.791   | 33.748   | 187.304        | 45.492   | 5371.671          |
| Liberia                  | 8094.022             | 5333.378                   | 348.730              | 2827.524  | 22.647    | 633.671   | 326.835    | 101.493           | 430.176  | 73.105   | 444.872  | 408.397  | 97.425   | 87.280         | 90.204   | 19319.759         |
| Madagascar               | 40466.847            | 406.652                    | 424.552              | 14.531    | 2937.466  | 304.926   | 109.450    | 91.938            | 70.341   | 808.545  | 6.611    | 11.196   | 123.739  | 16.769         | 28.920   | 45822.484         |
| Malawi                   | 2407.738             | 119.807                    | 277.766              | 3.254     | 88.163    | 10.679    | 65.065     | 61.129            | 24.706   | 46.822   | 2.596    | 2.389    | 12.832   | 36.845         | 10.010   | 3169.802          |
| Mali                     | 2555.039             | 160.443                    | 614.760              | 0.000     | 146.112   | 23.628    | 15.767     | 1.639             | 15.580   | 77.795   | 0.759    | 0.880    | 9.051    | 0.955          | 1.554    | 3623.961          |
| Mozambique               | 34327.465            | 4176.218                   | 1138.715             | 37.208    | 2292.926  | 2089.183  | 589.939    | 139.481           | 376.021  | 551.070  | 91.538   | 48.292   | 164.296  | 43.384         | 94.591   | 46160.328         |
| Namibia                  | 75.667               | 21.708                     | 54.070               | 0.000     | 26.194    | 0.000     | 2.370      | 0.167             | 3.508    | 7.659    | 0.000    | 0.000    | 1.616    | 0.038          | 0.150    | 193.145           |
| Niger                    | 0.169                | 0.048                      | 2.715                | 0.000     | 1.472     | 0.034     | 0.130      | 0.005             | 0.012    | 0.116    | 0.003    | 0.004    | 0.747    | 0.010          | 0.004    | 5.468             |
| Nigeria                  | 7620.853             | 3791.726                   | 12982.006            | 848.509   | 626.139   | 517.278   | 1242.190   | 69.243            | 231.839  | 305.063  | 384.180  | 465.626  | 81.323   | 46.180         | 60.938   | 29273.093         |
| Rwanda                   | 398.574              | 11.283                     | 67.221               | 0.883     | 3.457     | 0.663     | 50.716     | 17.010            | 6.630    | 17.627   | 1.532    | 1.572    | 6.642    | 16.441         | 2.787    | 603.038           |
| Senegal                  | 474.183              | 335.912                    | 383.897              | 1.019     | 33.457    | 32.454    | 32.345     | 2.379             | 12.777   | 29.377   | 0.905    | 0.960    | 8.868    | 1.044          | 2.181    | 1351.757          |
| Somalia                  | 52.124               | 22.992                     | 84.616               | 0.012     | 48.605    | 2.396     | 2.237      | 0.475             | 0.959    | 3.795    | 0.085    | 0.104    | 7.324    | 0.141          | 0.507    | 226.371           |
| South Africa             | 1855.470             | 376.956                    | 4865.100             | 2.345     | 165.823   | 32.222    | 290.109    | 5082.945          | 223.819  | 493.643  | 97.246   | 43.685   | 90.155   | 90.593         | 48.848   | 13758.958         |
| South Sudan              | 690.304              | 543.956                    | 312.226              | 33.614    | 418.102   | 35.074    | 62.959     | 11.615            | 56.797   | 26.965   | 5.790    | 4.373    | 17.320   | 3.094          | 10.379   | 2232.566          |
| Sudan                    | 13.947               | 13.309                     | 37.342               | 0.014     | 11.792    | 0.155     | 0.234      | 0.072             | 0.413    | 0.815    | 0.006    | 0.089    | 0.536    | 0.013          | 0.089    | 78.827            |
| Tanzania                 | 27300.338            | 3876.482                   | 2882.871             | 76.647    | 3230.277  | 2294.570  | 498.271    | 295.276           | 314.258  | 506.964  | 58.737   | 65.090   | 131.311  | 66.809         | 84.344   | 41682.245         |
| Uganda                   | 6450.705             | 763.612                    | 496.860              | 65.609    | 1267.421  | 241.417   | 273.005    | 166.579           | 139.848  | 151.276  | 44.247   | 150.969  | 203.874  | 57.556         | 55.974   | 10528.951         |
| Zambia                   | 24203.586            | 2769.860                   | 5440.349             | 4.805     | 679.179   | 121.213   | 368.714    | 81.342            | 356.030  | 509.230  | 3.888    | 4.359    | 91.629   | 6.258          | 26.775   | 34667.216         |
| Zimbabwe                 | 4234.595             | 145.496                    | 1084.631             | 0.909     | 247.071   | 32.839    | 91.187     | 205.386           | 54.217   | 181.102  | 2.779    | 2.254    | 41.765   | 22.810         | 17.278   | 6364.320          |

**Fig. A1:** Area in (Mha) of land-use following deforestation 2001-2020 by country across continental Africa 30 °south and 30 ° north

## Appendix B Training, validation and testing data sources

Below in Appendix B2, is a list of sources of data used in this study. The FAO 2010 Global Remote Sensing Survey data comes from [15, 27] with seven

classes of interest for this study (Appendix B2) and covers the whole study area. The data from IIASA [79] also covers the entire study area, however the data comes as point data showing the dominant land use for each location, thus does not delineate the land use boundaries. The Google research open-building dataset also covers the entire study area. Other data sources are either regional-specific and /or contains one land use class. For example [17] contains data from Ethiopia. Data from ICRAF covers only Ivory Coast, while IPIS data [30] contains mining data from the Democratic Republic of Congo (DRC).

| Data                                                                                                                                                             | LSCP | Pasture | Mining | SSCP | Roads | OLWTC | PF | Coffee | Settlement | TP | Water | OilPalm | Rubber | Cashew | Cacao |
|------------------------------------------------------------------------------------------------------------------------------------------------------------------|------|---------|--------|------|-------|-------|----|--------|------------|----|-------|---------|--------|--------|-------|
| FAD 2010 global Remote Sensing Survey                                                                                                                            | x    | x       | x      | x    |       | x     |    |        | x          |    | x     |         |        |        |       |
| Crowdsourced deforestation drivers (IIASA) (Bayasa et al., 2022) <a href="http://pure.iiasa.ac.at/id/eprint/17539/">http://pure.iiasa.ac.at/id/eprint/17539/</a> | x    | x       | x      | x    | x     |       | x  |        | x          |    |       | x       |        |        |       |
| Masolele et al., 2022 (Ethiopia)                                                                                                                                 | x    | x       | x      | x    | x     | x     | x  | x      | x          | x  | x     |         |        |        |       |
| ICRAF, Econometric                                                                                                                                               | x    |         |        | x    |       | x     |    |        | x          |    | x     | x       | x      | x      | x     |
| NAFORMA (Tanzania)                                                                                                                                               | x    |         | x      | x    |       |       | x  |        |            |    |       |         |        | x      |       |
| Large-scale farms and small holder (Jann et al., 2018) (Zambia)                                                                                                  | x    |         |        | x    |       |       |    |        |            |    |       |         |        |        |       |
| Global Map of Oil Palm Plantations (Descale et al., 2021)                                                                                                        |      |         |        |      |       |       |    |        |            |    |       | x       |        |        |       |
| Kenya GIS data (World Resources Institute - <a href="https://www.wri.org/data/kenya-gis-data">https://www.wri.org/data/kenya-gis-data</a> )                      | x    |         |        | x    |       |       | x  | x      |            | x  |       |         |        |        |       |
| Namibia                                                                                                                                                          | x    |         |        | x    |       |       |    |        |            |    |       |         |        |        |       |
| Ghana                                                                                                                                                            | x    |         | x      | x    |       |       |    |        |            |    |       | x       | x      | x      | x     |
| Google research open-buildings dataset ( <a href="https://sites.research.google/open-buildings/">https://sites.research.google/open-buildings/</a> )             |      |         |        |      |       |       |    |        | x          |    |       |         |        |        |       |
| <a href="https://ipisresearch.be/home/maps-data/open-data/">https://ipisresearch.be/home/maps-data/open-data/</a> (Mining)                                       |      |         | x      |      |       |       |    |        |            |    |       |         |        |        |       |
| Landuse data Nigeria ( <a href="https://grid3.gov.ng/datasets">https://grid3.gov.ng/datasets</a> )                                                               | x    |         |        | x    |       |       |    |        | x          |    |       | x       |        | x      | x     |
| Satellite based visual interpretation                                                                                                                            | x    | x       | x      | x    | x     | x     | x  | x      | x          | x  | x     | x       | x      | x      | x     |

**Fig. B2:** Sources of training, validation, and testing data used in this study.

## Appendix C Errors in training data

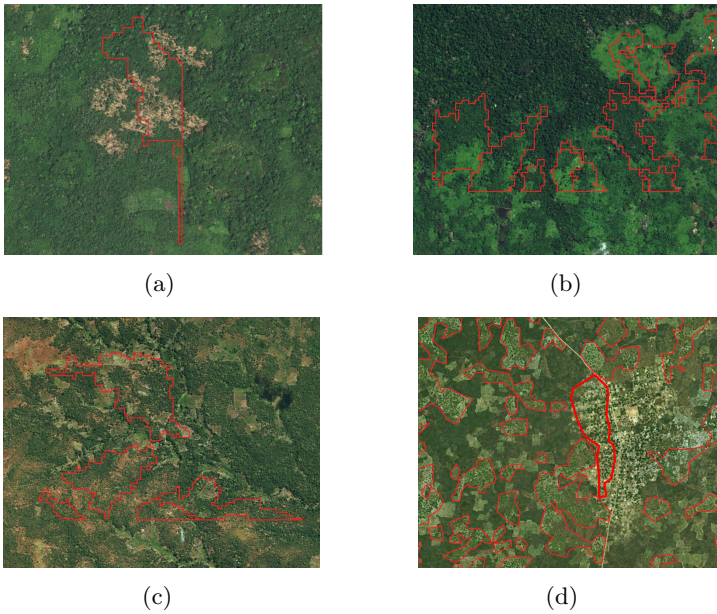

**Fig. C3:** Examples of errors in the reference labels of the training data. (a), (b) and (c) shows a mix of small-scale croplands and forest edges, while in (d) we observe settlement labeled as cashew crop in the bright red polygon.

## Appendix D Definitions of land-use following deforestation classes

| Main classes                       | Subclasses       | Sub classes                                    | Description                                                                                                                                                                        |
|------------------------------------|------------------|------------------------------------------------|------------------------------------------------------------------------------------------------------------------------------------------------------------------------------------|
| <b>Agriculture</b>                 | Cacao*           | -                                              | • Land under cultivation for cacao                                                                                                                                                 |
|                                    | Rubber*          | -                                              | • Land under cultivation for Rubber                                                                                                                                                |
|                                    | Oil palm*        | -                                              | • Land under cultivation for Oil palm, both small scale and large scale                                                                                                            |
|                                    | Tea plantations* | -                                              | • Land under cultivation for tea                                                                                                                                                   |
|                                    | Pasture*         | -                                              | • Land used predominantly for grazing; in either managed/cultivated (pastures) or natural (grazing land) setting; includes grazed woodlands                                        |
|                                    | Coffee*          | -                                              | • Land under cultivation for Coffee                                                                                                                                                |
|                                    | Cashew*          | -                                              | • Land under cultivation for Cashew                                                                                                                                                |
|                                    | Other croplands  | Small-scale cropland*<br>Large scale cropland* | -<br>-                                                                                                                                                                             |
| <b>Plantation forest*</b>          | -                | -                                              | • Planted forest established for commercial or other related wood extraction purposes                                                                                              |
| <b>Infrastructure</b>              | Settlements*     | -                                              | • Residential areas or infrastructures built-up for housing, industry, or commercial purposes.                                                                                     |
|                                    | Roads*           | -                                              | • Transport, accessibility                                                                                                                                                         |
| <b>Mining*</b>                     | -                | -                                              | • Land used for extractive subsurface and surface mining activities (e.g. underground and strip mines, quarries and gravel pits), including all associated surface infrastructure. |
| <b>Water*</b>                      | -                | -                                              | • Natural (river, lake etc.) or man-made water bodies (e.g. reservoirs), floods, meandering rivers                                                                                 |
| <b>Other land with tree cover*</b> | -                | -                                              | • All land that cannot be classified into the above land use categories                                                                                                            |

**Fig. D4:** Definitions of each category (denoted by a \* symbol) of land-use following deforestation as used in this study.
